# Supplementary material
Source: publisher figshare collection journal article supplement (https://acs.figshare.com/ndownloader/files/10486810)
Supplement: Supplementary file 1 [file 10486810]

## Supporting Information

### **Reducing the Coefficient of Thermal Expansion of Polyimide Films in Microelectronics Processing Using ZnS Particles at Low Concentrations**

Hyungjoon Jeon<sup>a,†</sup>, Cheolsang Yoon<sup>a,†</sup>, Young-Geon Song<sup>a</sup>, Junwon Han<sup>b</sup>, Sujin Kwon<sup>b</sup>,  
Seungwon Kim<sup>b</sup>, Insu Chang<sup>c</sup>, and Kangtaek Lee<sup>a,\*</sup>

<sup>a</sup>Department of Chemical and Biomolecular Engineering, Yonsei University, Seoul 03722,  
Republic of Korea

<sup>b</sup>Material Development P/J, Semiconductor R&D Center, Samsung Electronics, Hwaseong-si,  
Gyeonggi-do 18448, Republic of Korea

<sup>c</sup>Radiation Safety Management Division, Korea Atomic Energy Research Institute, Yuseong-gu,  
Daejeon 34057, Republic of Korea

\* TEL: +82-2-2123-2760; FAX: +82-2-312-6401; E-mail: [ktlee@yonsei.ac.kr](mailto:ktlee@yonsei.ac.kr)

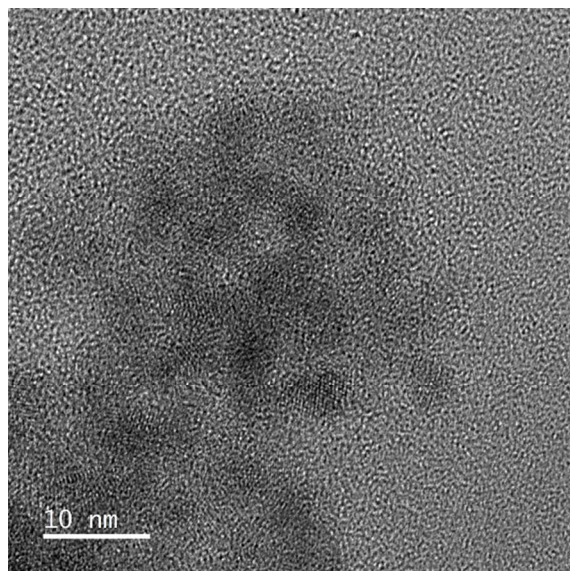

**Figure S1.** TEM image of the ZnS particles in high-resolution

**Table S1.** Properties of PI nanocomposites at 15 wt% filler concentration

|                                                                     | Bare PI | SiO <sub>2</sub> | ZrW <sub>2</sub> O <sub>8</sub> | Unmodified ZnS | Modified ZnS |
|---------------------------------------------------------------------|---------|------------------|---------------------------------|----------------|--------------|
| <b>Thermal diffusivity<sup>a</sup></b><br><b>(mm<sup>2</sup>/s)</b> | 0.172   | 0.176            | 0.179                           | 0.200          | 0.217        |
| <b>Density<sup>b</sup> (g/cm<sup>3</sup>)</b>                       | 1.40    | 1.59             | 1.95                            | 1.80           | 1.80         |
| <b>Specific heat capacity<sup>b</sup> (J/g·°C)</b>                  | 1.13    | 1.06             | 1.02                            | 1.03           | 1.03         |
| <b>Thermal conductivity<sup>c</sup></b><br><b>(W/m·K)</b>           | 0.272   | 0.297            | 0.356                           | 0.370          | 0.402        |

<sup>a</sup>Thermal diffusivity was determined by experiments; <sup>b</sup>Density and Specific heat capacity values were estimated based on the rule of mixture; <sup>c</sup>Thermal conductivity was calculated from the definition of the thermal diffusivity.
